# Supplementary material for: Improved methane dehydroaromatization reaction over Mo and Cr co-doped ZSM-5 catalyst
Source: Royal Society of Chemistry journal article supplement (doi:10.1039/d3nj00443k), 2023-01-01
Supplement: d3nj00443k1.pdf [file d3nj00443k1.pdf]

## Supplementary Information

### Improved methane dehydroaromatization reaction over Mo and Cr co-doped ZSM-5 catalyst

Koji Miyake,<sup>\*a,b</sup> Tomoka Sumi,<sup>a</sup> Shinya Kokuryo,<sup>a</sup> Haruna Kitamura,<sup>a</sup> Jose A. Hernandez  
Gaitan,<sup>a</sup> Yoshiaki Uchida<sup>a</sup> and Norikazu Nishiyama<sup>a,b</sup>

*<sup>a</sup>Division of Chemical Engineering, Graduate School of Engineering Science, Osaka University, 1-3  
Machikaneyama, Toyonaka, Osaka 560-8531, Japan*

*<sup>b</sup>Innovative Catalysis Science Division, Institute for Open and Transdisciplinary Research Initiatives (ICS-OTRI),  
Osaka University, Suita, Osaka 565-0871, Japan  
E-mail: [kojimiya@cheng.es.osaka-u.ac.jp](mailto:kojimiya@cheng.es.osaka-u.ac.jp)*

### Contents

|                                                  |             |
|--------------------------------------------------|-------------|
| <b>1. Experimental part</b> .....                | <b>2-3</b>  |
| <b>2. Supplementary tables and figures</b> ..... | <b>4-10</b> |

# 1. Experimental Part

## 1.1 Catalyst preparation

Ammonium Molybdate Tetrahydrate (Wako FUJIFILM), Chromium(III) Acetate (Wako FUJIFILM) and H<sup>+</sup> type ZSM-5 zeolite (822HOA, TOSOH Co.) were used without further purification. An incipient wetness impregnation was applied to load Mo or Cr on ZSM-5. First, ZSM-5 was mixed with an aqueous solution containing Mo or Cr. Afterward, the sample was dried at 363 K and calcined under air at 823 K for 5 h. The samples were denoted as “Mo/ZSM-5” and “Cr(x)/ZSM-5”, where x means the weight ratio of Cr [wt%]. Second, Mo was introduced to “Cr(x)/ZSM-5” by an incipient wetness impregnation similarly. Those samples were named “Mo/Cr(x)/ZSM-5”. As a comparison, we loaded 1 wt % of Cr on Mo/ZSM-5. The sample was denoted “Cr/Mo/ZSM-5”

## 1.2 Characterization

The crystal structures of all products were determined by X-ray diffraction (XRD) patterns recorded on a PANalytical X'Pert-MPD diffractometer using Cu-K $\alpha$  radiation. The morphology of samples was observed by transmission electron microscopy (TEM) observation. The energy dispersive X-ray spectroscopy (EDX) for the determination of Cr contents was performed on JEOL JCM-7000. To obtain physical information of samples, N<sub>2</sub> adsorption measurements at 77 K were conducted using BELSORP-Max (MicrotracBel). Diffuse reflectance ultraviolet-visible (UV-vis) spectra of the samples were analyzed on a JASCO V-770 spectrophotometer. NH<sub>3</sub> temperature programmed deposition (NH<sub>3</sub>-TPD) measurements were carried out to evaluate the acidity

## 1.3 Methane dehydroaromatization (MDA) reaction tests

MDA reactions over zeolite catalysts were carried out in a fixed bed reactor at atmospheric pressure referring to our previous work. The catalyst (0.05 g) was loaded into a quartz tube (i.d. 4 mm) and then the temperature was raised to 973 K under He flow. The feed gas of 66.5 vol% ethane and balanced He was fed at a total flow rate of 7.5 cm<sup>3</sup>/min. The product stream was analyzed online with Shimadzu GC-2025 gas chromatographs equipped with a flame ionization detector. GS ALUMINA was used as a GC column. Methane conversion [%] and product yields [%] were calculated as follows:

$$\text{Methane conversion [\%]} = 100 \times \frac{(C - \text{mol of methane at the inlet}) - (C - \text{mol of methane at the outlet})}{(C - \text{mol of methane at the inlet})}$$

$$(\text{Product yields [\%]}) = 100 \times \frac{(C - \text{mol of product at the outlet})}{(C - \text{mol of methane at the inlet})}$$

The amount of coke deposition on the spent catalysts was measured by Thermo Gravimetry Analyzer (TGA). The weight losses from 573 to 1073 K were assigned to the combustion of the deposited coke.

## 2. Supplementary tables and figures

Table S1 Si/Al, Si/Mo and Si/Cr ratios determined by EDX analysis

|                | Si/Al | Si/Mo | Si/Cr  |
|----------------|-------|-------|--------|
| ZSM-5          | 9.94  | -     | -      |
| Cr0.5/ZSM-5    | 10.37 | -     | 164.44 |
| Cr1.0/ZSM-5    | 11.19 | -     | 89.83  |
| Cr3.0/ZSM-5    | 10.53 | -     | 38.84  |
| Mo/ZSM-5       | 9.94  | 5.34  | -      |
| Mo/Cr0.5/ZSM-5 | 10.18 | 6.54  | 199.62 |
| Mo/Cr1.0/ZSM-5 | 9.87  | 7.17  | 127.34 |
| Mo/Cr3.0/ZSM-5 | 9.43  | 6.53  | 47.20  |

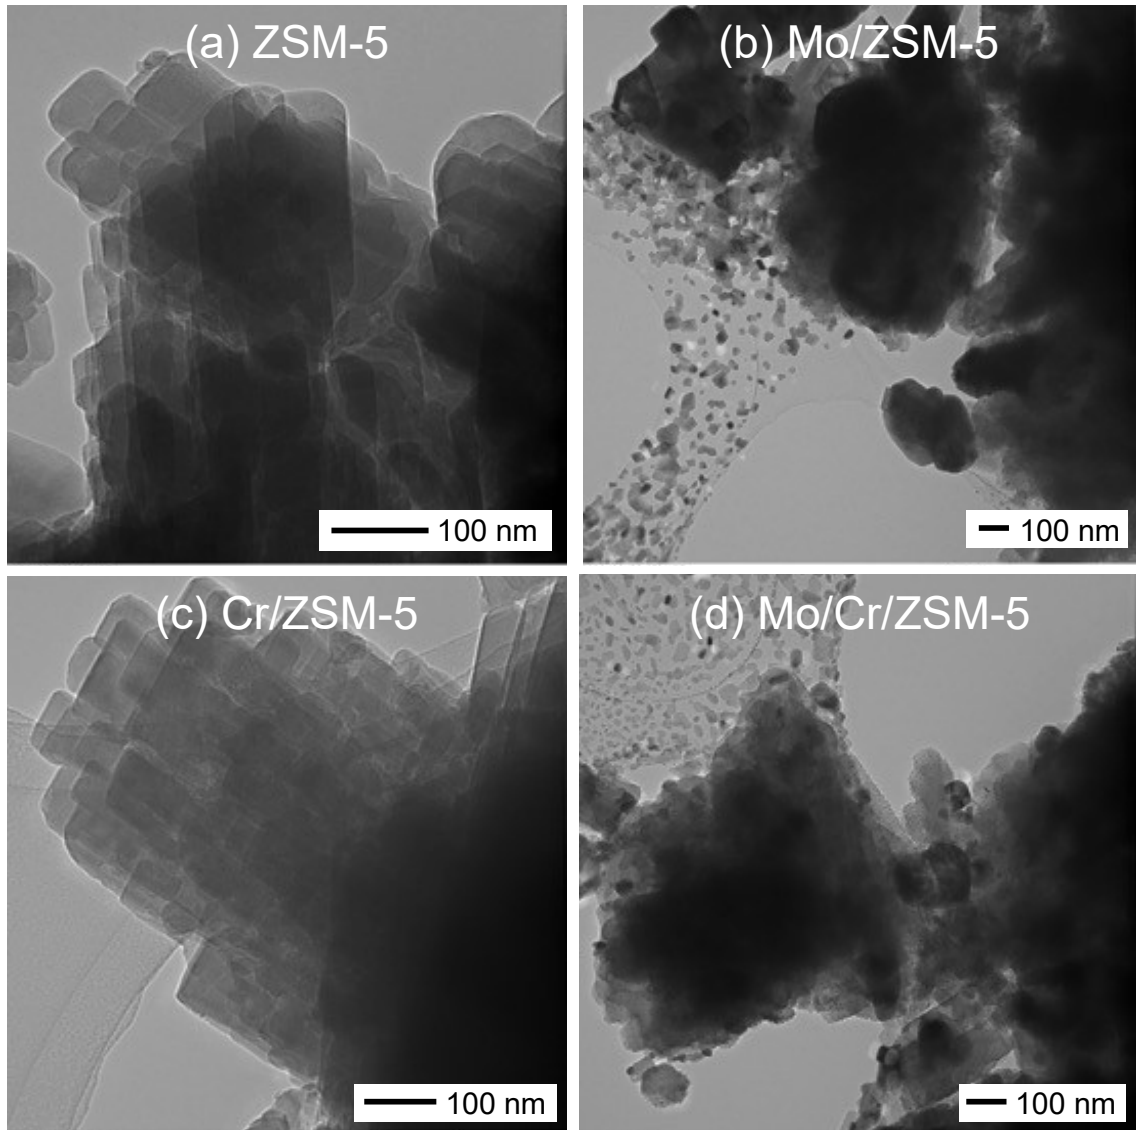

Fig. S1 (a) ZSM-5, (b) Mo/ZSM-5, (c) Cr/ZSM-5 and (d) Mo/Cr/ZSM-5.

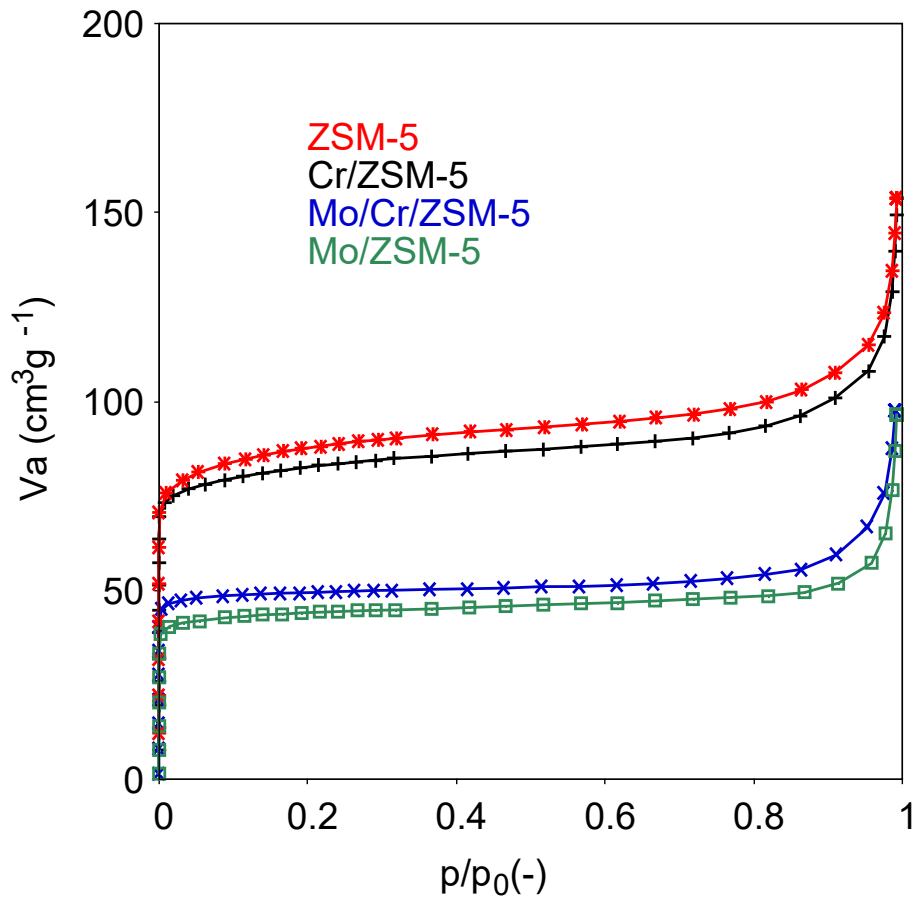

Fig. S2 N<sub>2</sub> adsorption isotherms of ZSM-5, Cr/ZSM-5, Mo/Cr/ZSM-5 and Mo/ZSM-5.

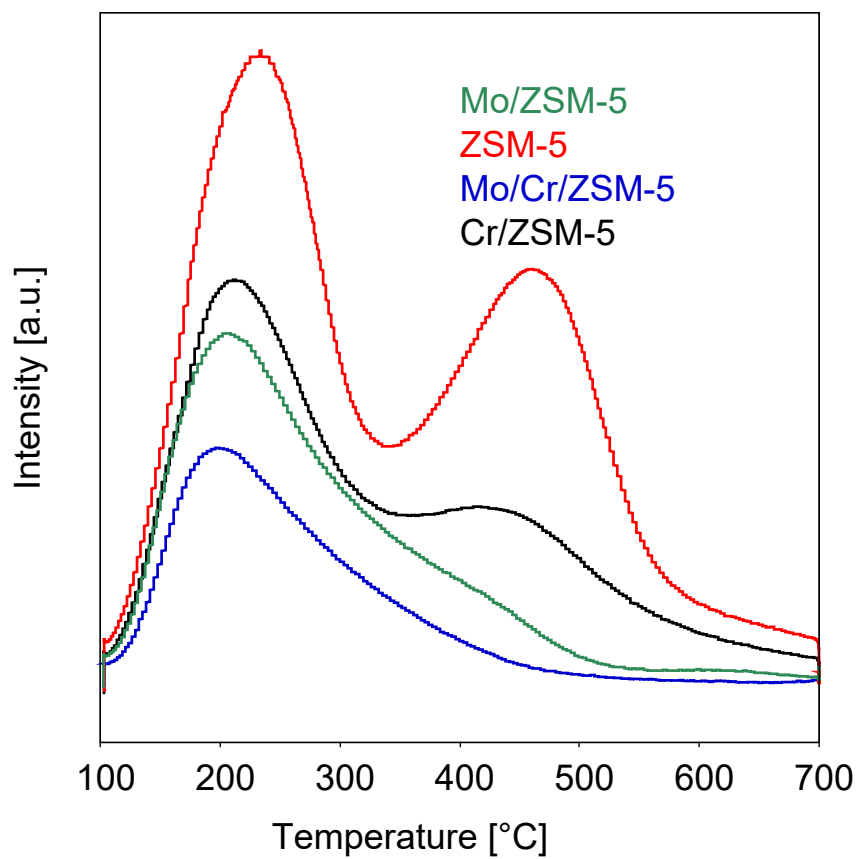

Fig. S3 NH<sub>3</sub>-TPD profiles of ZSM-5, Cr/ZSM-5, Mo/Cr/ZSM-5 and Mo/ZSM-5.

Table S2 Conversion and yields during MDA reaction over Mo/ZSM-5.

| Time on stream<br>[min] | Methane Conversion<br>[C-mol%] | Yield [C-mol%] |          |         |         |
|-------------------------|--------------------------------|----------------|----------|---------|---------|
|                         |                                | Ethane         | Ethylene | Benzene | Toluene |
| 60                      | 1.19                           | 0.02           | 0.38     | 0.81    | 0       |
| 120                     | 1.51                           | 0              | 0.34     | 0.52    | 0       |
| 180                     | 1.40                           | 0              | 0.32     | 0.37    | 0       |
| 240                     | 1.01                           | 0              | 0.27     | 0.27    | 0       |
| 300                     | 0.71                           | 0              | 0.25     | 0.25    | 0       |

Table S3 Conversion and yields during MDA over Mo/Cr1.0/ZSM-5.

| Time on stream<br>[min] | Methane Conversion<br>[C-mol%] | Yield [C-mol%] |          |         |         |
|-------------------------|--------------------------------|----------------|----------|---------|---------|
|                         |                                | Ethane         | Ethylene | Benzene | Toluene |
| 60                      | 2.43                           | 0.20           | 0.35     | 2.66    | 0.15    |
| 120                     | 1.80                           | 0.12           | 0.46     | 1.81    | 0       |
| 180                     | 3.47                           | 0.07           | 0.49     | 1.31    | 0       |
| 240                     | 2.35                           | 0.06           | 0.53     | 1.17    | 0       |
| 300                     | 2.46                           | 0.05           | 0.54     | 1.01    | 0       |



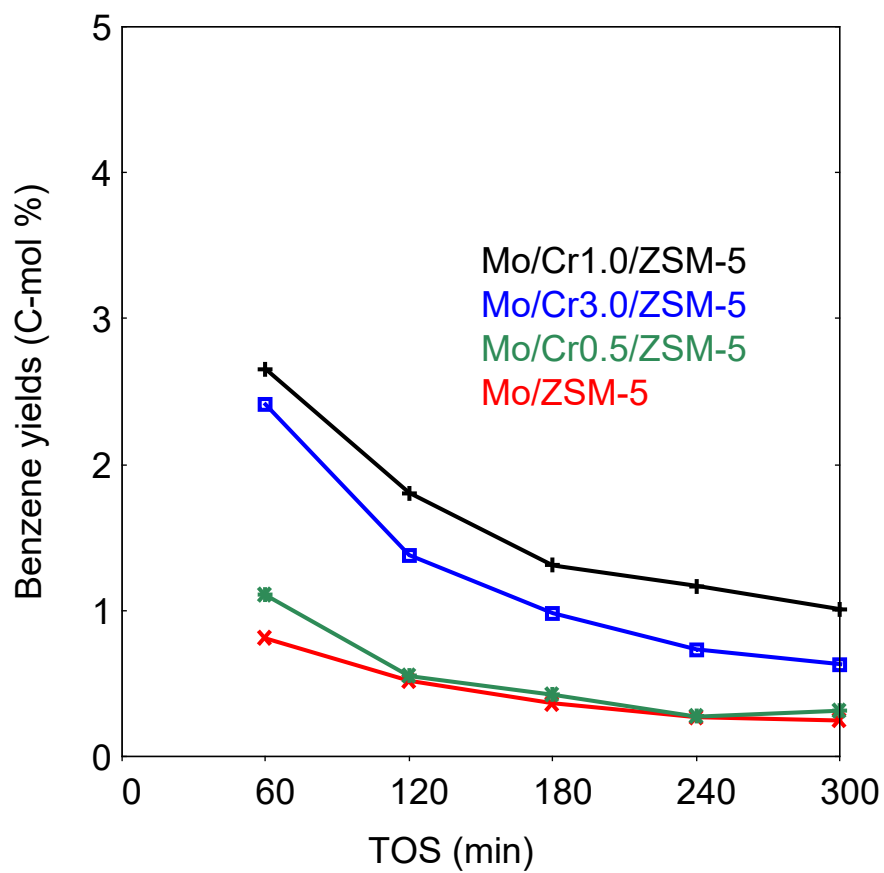

Fig. S4 Time courses of benzene yield over Mo/Cr(x)/ZSM-5 and Mo/ZSM-5.

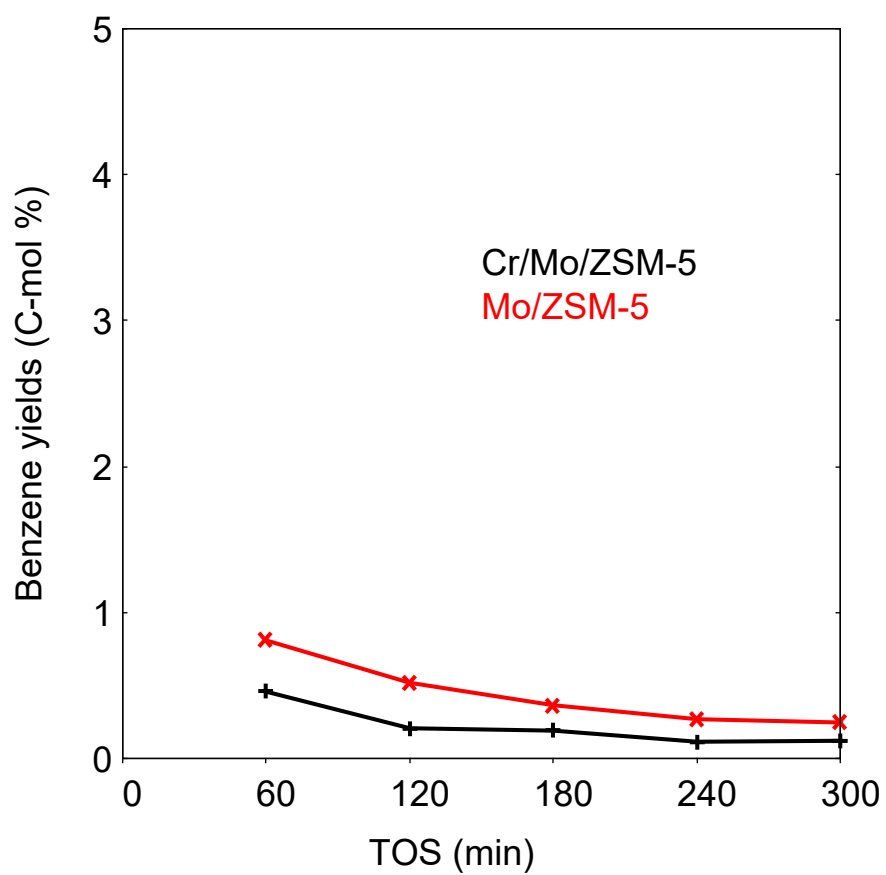

Fig. S5 Time courses of benzene yield over Cr/Mo/ZSM-5 and Mo/ZSM-5.
